# Supplementary material for: Personality Type Influences Attentional Bias in Individuals with Chronic Back Pain
Source: PubMed Central journal article supplement (PMC4720440; doi:10.1371/journal.pone.0147035), 2016-01-20
Supplement: pone.0147035.s002.pdf [file pone.0147035.s002.pdf]

| Participant number | Age | Sex | Marlowe-Crowne | Trait anxiety | State anxiety | Attentional bias threat | Attentional bias positive |
|--------------------|-----|-----|----------------|---------------|---------------|-------------------------|---------------------------|
| ZFDP01             | 53  | 1   | 10             | 33            | 34            | 18.34                   | 89.32                     |
| ZFDP02             | 70  | 1   | 5              | 36            | 30            | 54.70                   | 3.30                      |
| ZFDP03             | 24  | 0   | 4              | 53            | 30            | 33.16                   | 54.53                     |
| ZFDP04             | 48  | 1   | 4              | 31            | 39            | -20.14                  | -57.97                    |
| ZFDP05             | 55  | 0   | 5              | 39            | 37            | -62.21                  | -11.40                    |
| ZFDP06             | 43  | 1   | 6              | 59            | 39            | 25.56                   | 33.21                     |
| ZFDP07             | 58  | 1   | 8              | 42            | 31            | -9.59                   | -44.36                    |
| ZFDP08             | 48  | 1   | 8              | 37            | 25            | 72.24                   | -6.74                     |
| ZFDP09             | 66  | 1   | 9              | 31            | 34            | 1.80                    | -30.92                    |
| ZFDP10             | 67  | 0   | 8              | 60            | 27            | -4.50                   | 2.68                      |
| ZFDP11             | 88  | 1   | 9              | 27            | 21            | 41.90                   | -6.31                     |
| ZFDP12             | 63  | 0   | 8              | 44            | 35            | 24.77                   | -44.08                    |
| ZFDP13             | 66  | 0   | 6              | 45            | 44            | -4.08                   | 17.07                     |
| ZFDP14             | 54  | 0   | 8              | 61            | 34            | -80.02                  | 8.98                      |
| ZFDP15             | 27  | 1   | 4              | 49            | 36            | 73.39                   | 42.56                     |
| ZFDP16             | 60  | 0   | 9              | 63            | 41            | 89.85                   | 113.09                    |
| ZFDP17             | 56  | 0   | 8              | 49            | 32            | -108.17                 | -60.91                    |
| ZFDP18             | 47  | 1   | 6              | 52            | 47            | -36.57                  | -38.78                    |
| ZFDP19             | 64  | 0   | 5              | 34            | 22            | -8.89                   | -105.22                   |
| ZFDP20             | 44  | 1   | 9              | 29            | 21            | 6.02                    | -53.09                    |
| ZFDP21             | 57  | 1   | 8              | 34            | 29            | 62.66                   | -2.98                     |
| ZFDP22             | 58  | 0   | 9              | 56            | 30            | -31.38                  | 6.93                      |
| ZFDP23             | 55  | 1   | 9              | 54            | 26            | -24.79                  | -49.39                    |
| ZFDP24             | 59  | 1   | 10             | 66            | 61            | 27.72                   | 30.10                     |
| ZFDP25             | 34  | 0   | 9              | 40            | 33            | -6.50                   | -8.87                     |
| ZFDP26             | 36  | 0   | 6              | 49            | 31            | 7.93                    | 32.26                     |
| ZFDP27             | 37  | 0   | 6              | 40            | 40            | -7.72                   | -31.53                    |
| ZFDP28             | 29  | 1   | 10             | 36            | 34            | 4.19                    | -4.10                     |
| ZFDP29             | 49  | 1   | 8              | 41            | 24            | -39.18                  | 14.94                     |
| ZFDP30             | 69  | 1   | 8              | 49            | 25            | -16.31                  | 22.09                     |
| ZFDP31             | 42  | 1   | 7              | 38            | 35            | -129.04                 | -89.62                    |
| ZFDP32             | 48  | 1   | 10             | 40            | 30            | -51.88                  | 19.29                     |
| ZFDP33             | 30  | 1   | 10             | 42            | 34            | -18.09                  | 49.83                     |
| ZFDP34             | 64  | 1   | 9              | 39            | 20            | 28.14                   | 19.98                     |
| ZFDP35             | 67  | 1   | 8              | 50            | 36            | -43.59                  | 2.19                      |
| ZFDP36             | 45  | 0   | 10             | 20            | 20            | 2.65                    | -2.72                     |
| ZFDP37             | 60  | 1   | 7              | 45            | 26            | 0.00                    | 0.00                      |
| ZFDP38             | 41  | 1   | 6              | 43            | 34            | 0.00                    | 0.00                      |
| ZFDP39             | 61  | 1   | 5              | 27            | 20            | 0.00                    | 0.00                      |
| ZFDP40             | 41  | 1   | 7              | 34            | 28            | 0.00                    | 0.00                      |
| ZFDP41             | 61  | 1   | 8              | 30            | 23            | 0.00                    | 0.00                      |
| ZFDP42             | 39  | 1   | 7              | 49            | 50            | 0.00                    | 0.00                      |
| ZFDP43             | 39  | 1   | 5              | 34            | 26            | 0.00                    | 0.00                      |
| ZFDP44             | 62  | 0   | 6              | 29            | 25            | 0.00                    | 0.00                      |
| ZFDP45             | 28  | 1   | 3              | 56            | 29            | 0.00                    | 0.00                      |
| ZFDP46             | 40  | 0   | 9              | 22            | 20            | 0.00                    | 0.00                      |
| ZFDP47             | 58  | 0   | 6              | 27            | 21            | 0.00                    | 0.00                      |

|        |    |   |   |    |    |        |        |
|--------|----|---|---|----|----|--------|--------|
| ZFDP48 | 38 | 1 | 4 | 61 | 25 | 0.00   | 0.00   |
| ZFDP49 | 49 | 1 | 2 | 23 | 20 | 0.00   | 0.00   |
| ZFDP50 | 28 | 0 | 7 | 37 | 21 | 0.00   | 0.00   |
| ZFDP51 | 71 | 1 | 4 | 40 | 29 | 0.00   | 0.00   |
| ZFDP52 | 55 | 1 | 5 | 38 | 20 | 0.00   | 0.00   |
| ZFDP53 | 70 | 0 | 7 | 35 | 32 | 0.00   | 0.00   |
| ZFDP54 | 56 | 1 | 6 | 33 | 26 | 0.00   | 0.00   |
| ZFDP55 | 30 | 1 | 8 | 55 | 23 | 0.00   | 0.00   |
| ZFDP56 | 65 | 0 | 8 | 29 | 26 | 42.97  | -34.41 |
| ZFDP57 | 33 | 0 | 2 | 62 | 22 | -6.56  | 5.44   |
| ZFDP58 | 43 | 1 | 4 | 40 | 40 | -10.73 | 11.49  |
| ZFDP59 | 31 | 1 | 3 | 58 | 23 | -11.86 | 2.50   |
| ZFDP60 | 40 | 1 | 6 | 47 | 27 | -1.57  | -38.87 |
| ZFDP61 | 60 | 1 | 3 | 64 | 22 | -8.29  | 13.14  |
| ZFDP62 | 44 | 1 | 9 | 57 | 23 | -50.13 | 4.18   |
| ZFDP63 | 35 | 1 | 8 | 59 | 38 | -16.46 | 33.95  |
| ZFDP64 | 53 | 1 | 4 | 50 | 36 | 44.49  | 32.81  |
| ZFDP65 | 57 | 0 | 4 | 31 | 33 | 2.24   | 3.61   |
| ZFDP66 | 38 | 1 | 8 | 41 | 29 | -48.13 | -2.30  |
| ZFDP67 | 54 | 1 | 4 | 41 | 33 | -18.03 | 13.71  |
| ZFDP68 | 69 | 1 | 8 | 25 | 22 | 49.11  | -12.77 |
| ZFDP69 | 44 | 0 | 8 | 29 | 31 | 27.65  | -27.66 |
| ZFDP70 | 30 | 1 | 8 | 25 | 20 | 18.85  | -17.54 |

| Mean RT Threat | Mean RT Positive | Neutral RT | Trials excluded | % errors |
|----------------|------------------|------------|-----------------|----------|
| 677.71         | 748.69           | 659.36     | 11              | 4.4      |
| 582.27         | 530.87           | 527.57     | 8               | 3.2      |
| 658.82         | 680.18           | 625.66     | 8               | 3.2      |
| 577.35         | 539.52           | 597.49     | 5               | 2.0      |
| 468.88         | 519.68           | 531.09     | 13              | 5        |
| 593.53         | 601.17           | 567.97     | 5               | 2.0      |
| 524.66         | 489.89           | 534.25     | 6               | 2.4      |
| 609.47         | 530.50           | 537.23     | 11              | 4.4      |
| 619.10         | 586.38           | 617.30     | 12              | 4.8      |
| 482.23         | 485.83           | 483.15     | 12              | 4.8      |
| 572.41         | 524.20           | 530.51     | 6               | 2.4      |
| 687.06         | 618.21           | 662.29     | 10              | 4        |
| 736.72         | 757.87           | 740.81     | 8               | 3.2      |
| 457.26         | 546.27           | 537.28     | 12              | 4.8      |
| 662.73         | 631.90           | 589.34     | 6               | 2.4      |
| 549.32         | 572.56           | 461.94     | 6               | 2.4      |
| 537.00         | 584.26           | 645.17     | 8               | 3.2      |
| 596.27         | 594.06           | 632.84     | 5               | 2        |
| 597.71         | 501.37           | 606.60     | 8               | 3.2      |
| 582.96         | 523.85           | 576.93     | 3               | 1.2      |
| 653.34         | 587.70           | 590.68     | 6               | 2.4      |
| 550.31         | 588.62           | 581.69     | 5               | 2        |
| 546.59         | 521.99           | 571.38     | 10              | 4        |
| 542.27         | 544.65           | 514.55     | 6               | 2.4      |
| 457.62         | 455.24           | 464.11     | 4               | 1.6      |
| 507.13         | 531.46           | 499.20     | 5               | 2        |
| 467.16         | 443.35           | 474.88     | 6               | 2.4      |
| 551.49         | 543.20           | 547.30     | 4               | 1.6      |
| 625.65         | 679.77           | 664.83     | 11              | 4.4      |
| 648.38         | 686.78           | 664.69     | 10              | 4        |
| 478.51         | 517.93           | 607.55     | 8               | 3.2      |
| 612.95         | 684.12           | 664.831    | 11              | 4.4      |
| 515.98         | 583.91           | 534.08     | 5               | 2        |
| 646.21         | 638.06           | 618.08     | 9               | 3.6      |
| 518.05         | 563.83           | 561.64     | 4               | 1.6      |
| 511.46         | 506.08           | 508.81     | 4               | 1.6      |
| 0.00           | 0.00             | 591.87     | 7               | 2.8      |
| 0.00           | 0.00             | 462.26     | 9               | 3.6      |
| 0.00           | 0.00             | 592.31     | 2               | 0.8      |
| 0.00           | 0.00             | 466.34     | 4               | 1.6      |
| 0.00           | 0.00             | 676.98     | 8               | 3.2      |
| 0.00           | 0.00             | 533.00     | 3               | 1.2      |
| 0.00           | 0.00             | 639.28     | 4               | 1.6      |
| 0.00           | 0.00             | 578.54     | 8               | 3.2      |
| 0.00           | 0.00             | 561.06     | 4               | 1.6      |
| 0.00           | 0.00             | 576.93     | 7               | 2.8      |
| 0.00           | 0.00             | 647.94     | 4               | 1.6      |

|        |        |        |   |     |
|--------|--------|--------|---|-----|
| 0.00   | 0.00   | 533.00 | 3 | 1.2 |
| 0.00   | 0.00   | 505.99 | 9 | 3.6 |
| 0.00   | 0.00   | 581.14 | 4 | 1.6 |
| 0.00   | 0.00   | 676.63 | 4 | 1.6 |
| 0.00   | 0.00   | 662.56 | 4 | 1.6 |
| 0.00   | 0.00   | 636.02 | 4 | 1.6 |
| 0.00   | 0.00   | 657.48 | 7 | 2.8 |
| 0.00   | 0.00   | 534.25 | 6 | 2.4 |
| 674.06 | 596.68 | 631.09 | 4 | 1.6 |
| 526.44 | 538.44 | 533.00 | 3 | 1.2 |
| 544.16 | 566.37 | 554.88 | 5 | 2   |
| 521.14 | 535.50 | 533.00 | 3 | 1.2 |
| 617.31 | 580.01 | 618.88 | 6 | 2.4 |
| 524.71 | 546.14 | 533.00 | 3 | 1.2 |
| 499.80 | 554.12 | 549.94 | 8 | 3.2 |
| 540.69 | 591.10 | 557.16 | 0 | 0   |
| 619.50 | 607.82 | 575.01 | 6 | 2.4 |
| 553.52 | 554.89 | 551.29 | 2 | 0.8 |
| 620.58 | 666.41 | 668.71 | 4 | 1.6 |
| 625.48 | 657.23 | 643.51 | 3 | 1.2 |
| 682.88 | 621.00 | 633.77 | 4 | 1.6 |
| 634.10 | 578.79 | 606.45 | 5 | 2   |
| 658.47 | 622.08 | 639.62 | 5 | 2   |
